# Supplementary material for: An NXF1 mRNA with a retained intron is expressed in hippocampal and neocortical neurons and is translated into a protein that functions as an Nxf1 cofactor
Source: PubMed Central journal article supplement — Mol Biol Cell. 2016 Dec 1;27(24):3903–12. doi: 10.1091/mbc.E16-07-0515 (PMC5170612; doi:10.1091/mbc.e16-07-0515), 2016-12-01
Supplement: supp_E16-07-0515v1_CombinedSupMats.pdf [file supp_E16-07-0515v1_CombinedSupMats.pdf]

# Supplemental Materials

*Molecular Biology of the Cell*

Li et al.

Supplementary Information

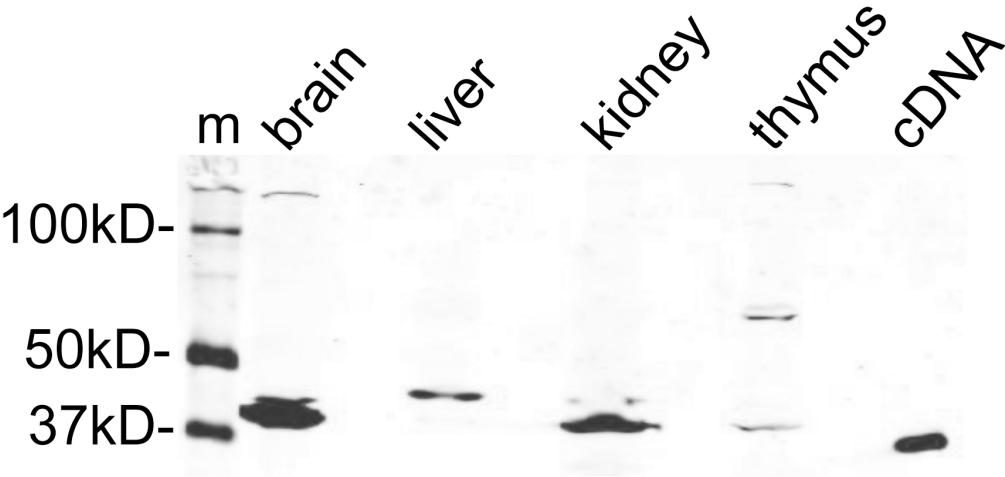

**Figure S1. Western blot analysis of sNxf1 expression in lysates from mouse tissue.** Each lane contained extracts of the indicated mouse tissue. The blot was developed using an antibody raised against the unique 18-residue peptide sequence found within intron 10.
